# Supplementary material for: Influence of Dietary Supplementation of Probiotic Pediococcus acidilactici MA18/5M During the Transition From Freshwater to Seawater on Intestinal Health and Microbiota of Atlantic Salmon (Salmo salar L.)
Source: Front Microbiol. 2019 Sep 27;10:2243. doi: 10.3389/fmicb.2019.02243 (PMC6777325; doi:10.3389/fmicb.2019.02243)
Supplement: Supplementary file 2 [file Table_1.xlsx]

## Sheet: Ark1
Supplementary Table 1. Relative abundance of digesta and mucosa associated microbiota at phylum level of the distal intestine of Atlantic salmon fed control and probiotic diet during freshwater (FW) and seawater (SW) stages.
	Freshwater				Seawater
	Digesta		Mucosa		Digesta		Mucosa
Phylum	Control	Probiotic	Control	Probiotic	Control	Probiotic	Control	Probiotic
Firmicutes	91.55 ± 7.32	95.32 ± 3.03	57.06 ± 18.09	58.16 ± 24.39	88.05 ± 0.8	65.77 ± 14.08	27.9 ± 8.07	22.72 ± 10.19
Fusobacteria	5.9 ± 6.37	2.11 ± 2.96	2.34 ± 4.95	6.09 ± 8.4	4.9 ± 1.73	8.39 ± 5.99	25.77 ± 9.29	2.21 ± 2.56
Proteobacteria	0.89 ± 0.6	0.72 ± 0.49	23.56 ± 9.52	16.26 ± 12.01	4.89 ± 0.81	11.28 ± 5.91	19.57 ± 13.1	63.03 ± 8.1
Actinobacteria	1.16 ± 0.11	1.76 ± 0.87	13.23 ± 6	10.64 ± 8.03	1.72 ± 0.6	4.19 ± 2.96	17.66 ± 6.23	7.81 ± 3.41
Spirochaetes	0.41 ± 0.35	0.03 ± 0.04	0.34 ± 0.68	1.55 ± 2.59	0.04 ± 0.06	9.1 ± 15.27	0.71 ± 1.09	0.59 ± 1.43
Bacteroidetes	0.04 ± 0.04	0.04 ± 0.01	3.23 ± 2.14	6.72 ± 6.62	0.17 ± 0.13	1.02 ± 0.88	4.99 ± 3.31	1.47 ± 1.39
SR1	0.02 ± 0.03	0 ± 0	0 ± 0	0 ± 0	0 ± 0	0 ± 0	0.54 ± 1.03	0 ± 0
Cyanobacteria	0.02 ± 0.01	0 ± 0	0.04 ± 0.1	0.16 ± 0.29	0.16 ± 0.1	0.12 ± 0.04	0.55 ± 1.34	0.83 ± 1.29
Other	0.01 ± 0.01	0.02 ± 0.01	0.01 ± 0.01	0.02 ± 0.01	0.06 ± 0.04	0.11 ± 0.09	0.14 ± 0.31	0.61 ± 1.31
TM7	0 ± 0	0 ± 0	0.13 ± 0.21	0.06 ± 0.07	0.01 ± 0.01	0 ± 0	0.05 ± 0.07	0 ± 0
Armatimonadetes	0 ± 0	0 ± 0	0 ± 0	0 ± 0	0 ± 0	0 ± 0	0.78 ± 1.91	0 ± 0
Acidobacteria	0 ± 0	0 ± 0	0.06 ± 0.16	0 ± 0	0 ± 0	0 ± 0	0 ± 0	0 ± 0
Elusimicrobia	0 ± 0	0 ± 0	0 ± 0	0 ± 0	0 ± 0	0 ± 0	0 ± 0	0.29 ± 0.72
Tenericutes	0 ± 0	0 ± 0	0 ± 0	0 ± 0	0 ± 0	0.01 ± 0	1.15 ± 2.81	0.28 ± 0.68
[Thermi]	0 ± 0	0 ± 0	0 ± 0	0.34 ± 0.84	0 ± 0	0 ± 0	0.2 ± 0.48	0.15 ± 0.33
